# Supplementary material for: A higher burden of metabolic risk factors and underutilization of therapy among women compared to men might influence a poorer prognosis: a study among acute myocardial ifarction patients in Albania, a transitional country in Southeastern Europe
Source: PubMed Central journal article supplement (PMC4707925; doi:10.3325/cmj.2015.56.542), 2015-12
Supplement: CroatMedJ_56_s004.pdf [file CroatMedJ_56_s004.pdf]

**Online supplemental material, Table 1.** Gender differences in coronary risk factors, and AMI complications among patients hospitalized for an acute myocardial infarction (AMI)

| Risk factor              | IRR (95% CI)       |                    |
|--------------------------|--------------------|--------------------|
|                          | Model 1            | Model 2            |
| Obesity                  | 1.89 (1.03 - 3.48) | 2.17 (1.15 - 4.09) |
| Hypercholesterolemia     | 0.96 (0.74 - 1.24) | 0.93 (0.72 - 1.21) |
| Diabetes                 | 1.40 (1.11 - 1.75) | 1.35 (1.07 - 1.71) |
| Hypertension             | 1.11 (0.95 - 1.29) | 1.01 (0.86 - 1.18) |
| Smoking                  | 0.23 (0.13 - 0.40) | 0.24 (0.14 - 0.43) |
| AMI complication         |                    |                    |
| Heart failure            | 1.53 (1.18 - 2.00) | 1.32 (1.02 - 1.74) |
| Impaired LV function     | 1.62 (1.21 - 2.18) | 1.44 (1.06 - 1.96) |
| Ventricular fibrillation | 3.06 (1.15 - 8.09) | 2.82 (1.07 - 7.43) |

IRR: incidence rate ratio obtained from Poisson regression analyses, comparing women to men

LV: left ventricle

Model 1: Unadjusted

Model 2: Adjusted for age
