# Supplementary material for: A higher burden of metabolic risk factors and underutilization of therapy among women compared to men might influence a poorer prognosis: a study among acute myocardial ifarction patients in Albania, a transitional country in Southeastern Europe
Source: PubMed Central journal article supplement (PMC4707925; doi:10.3325/cmj.2015.56.542), 2015-12
Supplement: CroatMedJ_56_s005.pdf [file CroatMedJ_56_s005.pdf]

**Online supplemental material, Table 2.** Gender differences in receiving evidence-based therapy among patients hospitalized for an acute myocardial infarction (AMI)

|                                | IRR (95% CI)       |                    |                    |
|--------------------------------|--------------------|--------------------|--------------------|
|                                | Model 1            | Model 2            | Model 3            |
| Beta-blocker                   | 0.79 (0.58 - 1.06) | 0.85 (0.63 - 1.15) | -                  |
| ACEI/ARB                       | 0.89 (0.69 - 1.14) | 0.87 (0.68 - 1.13) | -                  |
| Aspirin                        | 0.91 (0.83 - 1.01) | 0.93 (0.84 - 1.02) | -                  |
| Statin                         | 0.98 (0.92 - 1.04) | 0.99 (0.92 - 1.06) | -                  |
| All 4 drug classes             | 0.66 (0.43 - 1.01) | 0.69 (0.45 - 1.08) |                    |
| Revascularization              |                    |                    |                    |
| PCI or CABG                    | 0.51 (0.32 - 0.80) | 0.56 (0.35 - 0.89) | 0.56 (0.36 - 0.90) |
| Any type of revascularization* | 0.60 (0.41 - 0.90) | 0.65 (0.43 - 0.98) | 0.64 (0.42 - 0.98) |

IRR: incidence rate ratio obtained from Poisson regression analyses, comparing women to men

ACEI: angiotensin-converting enzyme inhibitor

ARB: angiotensin receptor blocker

PCI: percutaneous coronary intervention

CABG: coronary bypass surgery

Model 1: Unadjusted

Model 2: Adjusted for age

Model 3: adjusted for age and AMI complications

\* PCI, CABG or thrombolysis
